# Supplementary material for: A Bio-inspired Hypoxia Sensor using HIF1a-Oxygen-Dependent Degradation Domain
Source: PubMed Central journal article supplement (PMC6506541; doi:10.1038/s41598-019-43618-4), 2019-05-08
Supplement: 41598_2019_43618_MOESM1_ESM.pdf [file 41598_2019_43618_MOESM1_ESM.pdf]

## SUPPLEMENTARY INFORMATION

### **A Bio-inspired Hypoxia Sensor using HIF1a-Oxygen-Dependent Degradation Domain**

Pablo Iglesias<sup>1</sup>, Cristina Penas<sup>2</sup>, Laura Barral-Cagiao<sup>1</sup>, Elena Pazos<sup>3\*</sup>, Jose A. Costoya<sup>1\*</sup>

*1. Molecular Oncology Laboratory. Departamento de Fisiología, Facultade de Medicina and Centro de Investigación en Medicina Molecular y Enfermedades Crónicas (CIMUS). Instituto de Investigación Sanitaria de Santiago de Compostela (IDIS). Universidade de Santiago de Compostela, Santiago de Compostela, Spain.*

*2. Centro Singular de Investigación en Química Biolóxica e Materiais Moleculares (CiQUS), Departamento de Química Orgánica, Universidade de Santiago de Compostela. 15782 Santiago de Compostela, Spain.*

*3. Departamento de Química, Facultade de Ciencias and Centro de Investigacións Científicas Avanzadas (CICA), Universidade da Coruña, 15071 A Coruña, Spain.*

*\* Corresponding authors*

*E-mail: elena.pazos@udc.es; josea.costoya@usc.es*

## Outline of the peptide synthesis and characterization

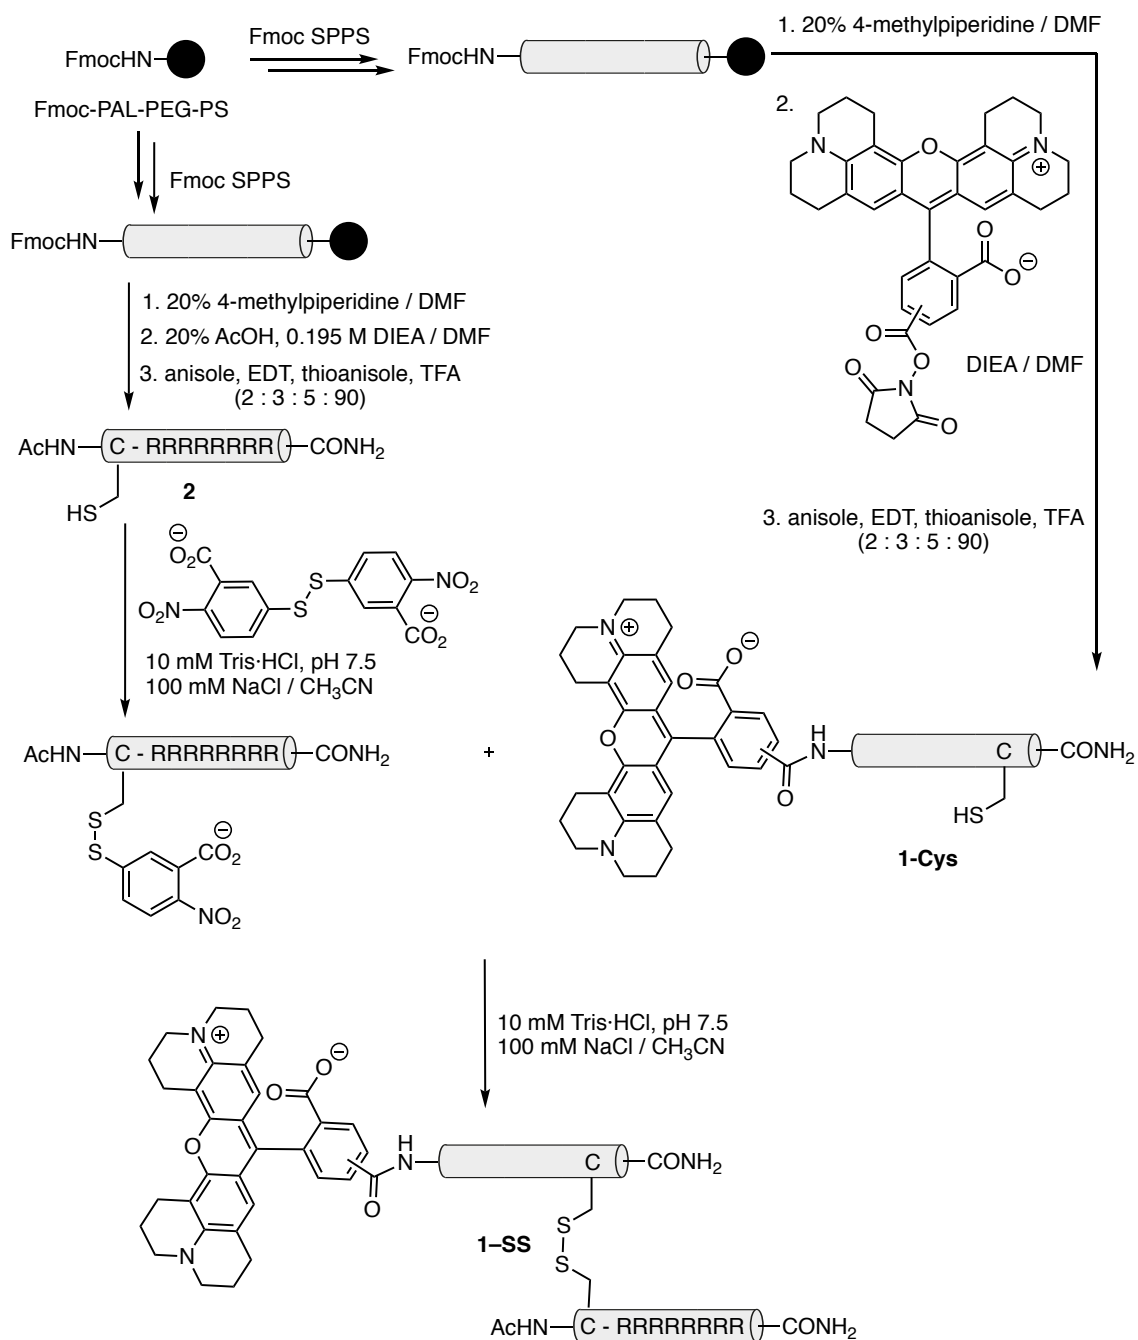

**Figure S1.** Synthesis of peptide 1-SS.

**1:** MALDI-TOF MS:  $[MH]^+$  calcd for  $C_{190}H_{294}N_{56}O_{48}S_2 = 4193,1800$ , found = 4193.5331. (8.7 mg, 8% yield for 0.025 mmol scale).

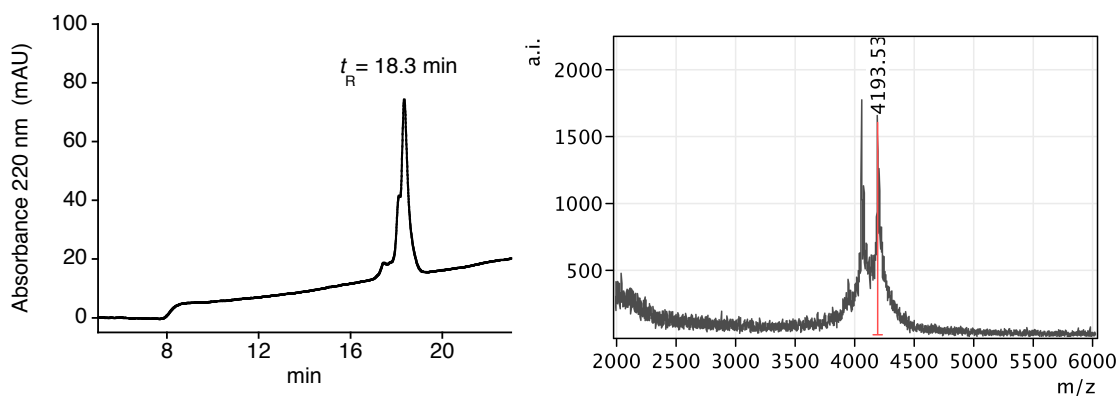

**Figure S2. Left:** HPLC trace, and **Right:** MALDI-MS spectrum of peptide **1**.

**1-SS:** MALDI-TOF MS:  $[MH]^+$  calcd for  $C_{192}H_{296}N_{58}O_{48}S_4 = 4311,1460$ , found = 4314.7993.

(1.8 mg, 24% yield for 0.0017 mmol scale).

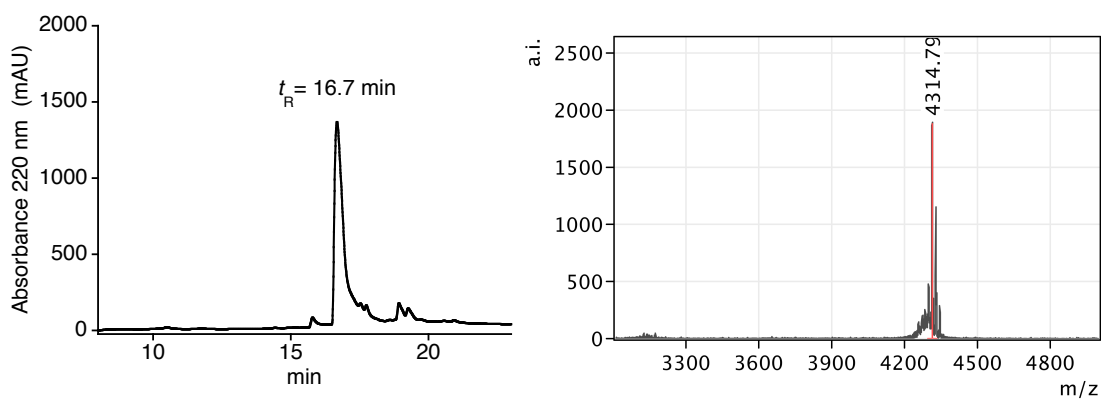

**Figure S3. Left:** HPLC trace, and **Right:** MALDI-MS spectrum of peptide **1-SS**.

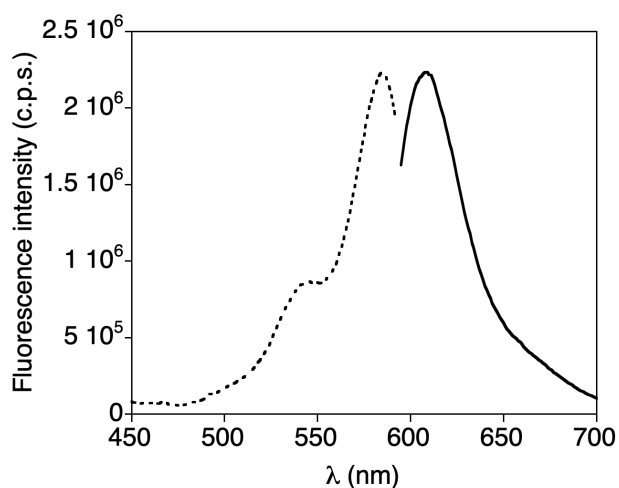

**Figure S4:** Excitation (dotted line) and emission (solid line) of a  $1\mu\text{M}$  solution of peptide **1** in PBS.

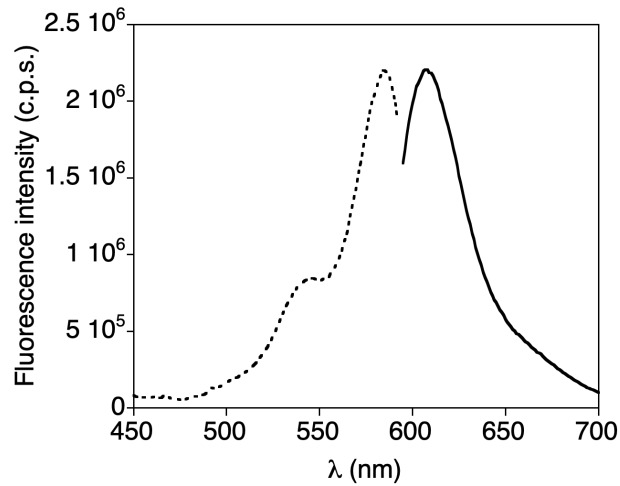

**Figure S5:** Excitation (dotted line) and emission (solid line) of a 1 $\mu$ M solution of peptide 1-SS in PBS.

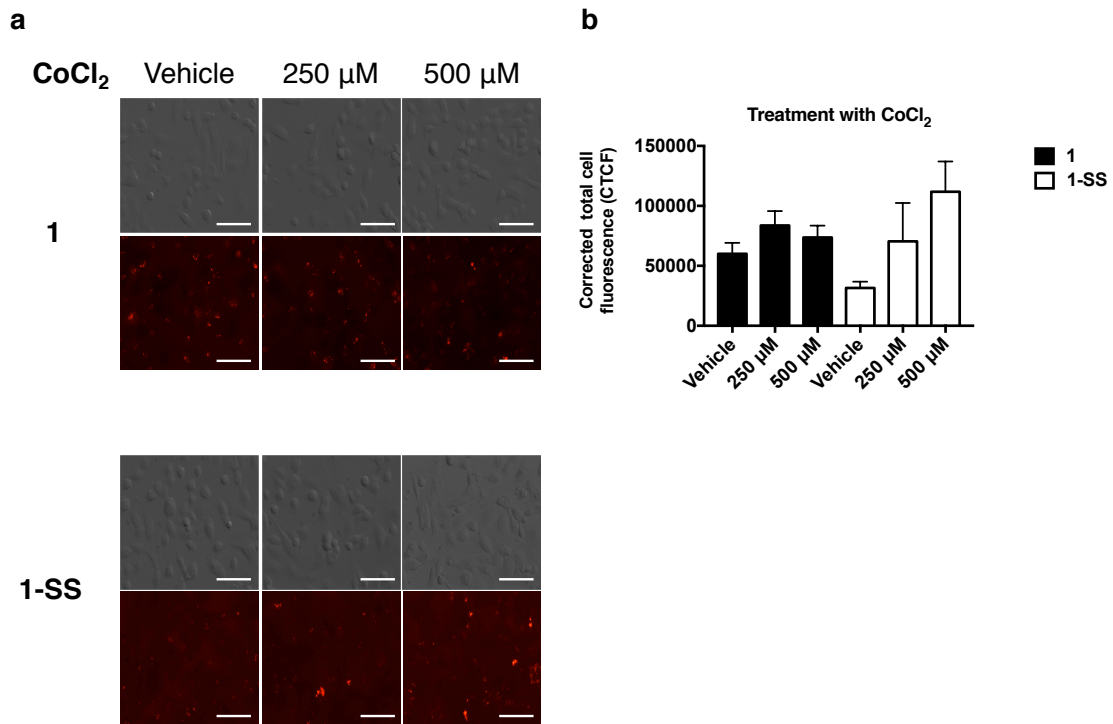

**Figure S6:** (a) Micrographs of MDA-MB-231 treated with the peptidic sensors 1 and 1-SS (500 ng/mL). Cells were treated with CoCl<sub>2</sub> as well at the indicated concentrations. Images were taken 3 hours upon treatment at 40X magnification. Scale = 50  $\mu$ m. (b) Quantification of the corrected total cell fluorescence (CTCF), error bars represent SEM.

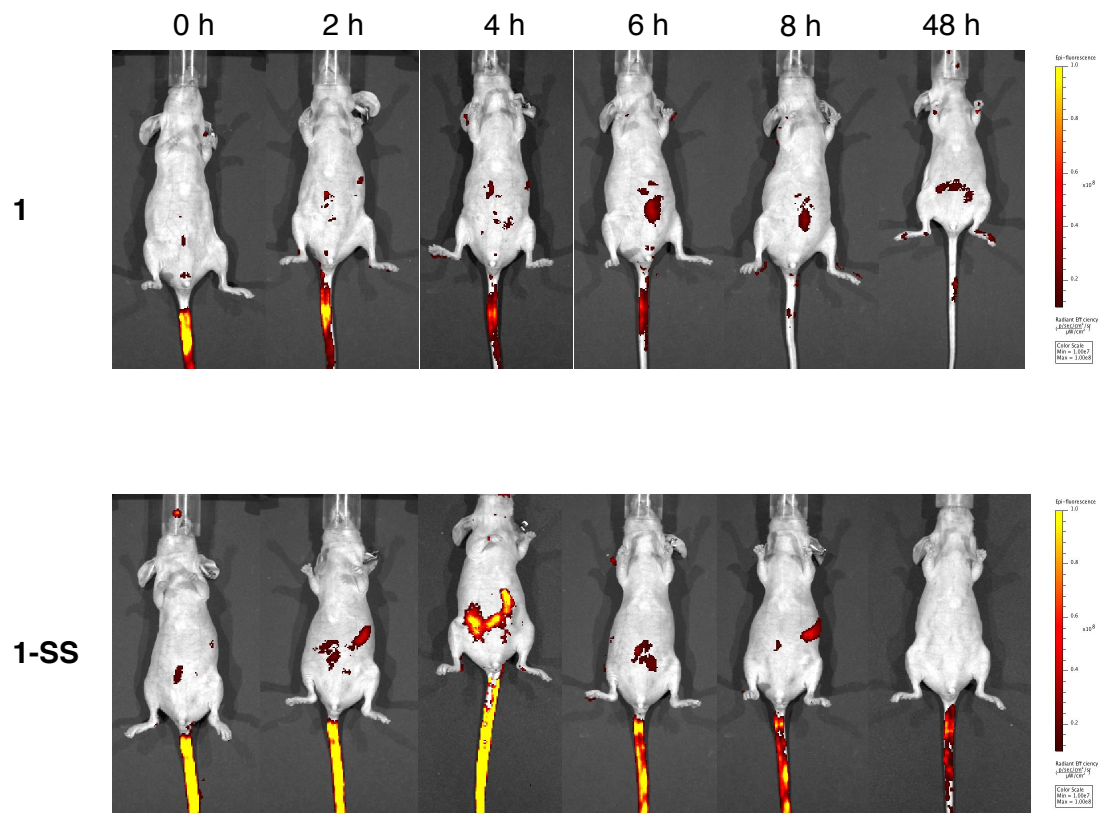

**Figure S7:** Additional time points comparing fluorescence between peptidic sensors **1** and **1-SS**.
